# Supplementary material for: Electrostatic interaction driven gold nanoparticle assembly on three-dimensional triangular pyramid DNA nanostructures
Source: Royal Society of Chemistry journal article supplement (doi:10.1039/c7nj01944k), 2017-01-01
Supplement: c7nj01944k1.pdf [file c7nj01944k1.pdf]

Supplementary information

**Electrostatic interaction driven gold nanoparticle  
assembly on three-dimensional triangular pyramid DNA  
nanostructures**

*Jaejung Song,<sup>a</sup> Sungmin Park,<sup>b</sup> Sehwan Kim,<sup>b</sup> Kyuhyun Im,<sup>c</sup> and Nokyoung Park<sup>\*b</sup>*

<sup>a</sup> School of Interdisciplinary Bioscience and Bioengineering, Pohang University of Science & Technology (POSTECH), San 31, Hyojadong, Namgu, Pohang 790-784, Republic of Korea.

<sup>b</sup> Department of Chemistry, Myongji University, Yongin, Gyeonggi-do 449-728, Republic of Korea, E-mail: [pospnk@mju.ac.kr](mailto:pospnk@mju.ac.kr); Tel: +82-31-330-6188, Fax: +82-31-335-7248.

<sup>c</sup> Samsung Advanced Institute of Technology, Samsung Electronics, Yongin, Gyeonggido 446-712, South Korea

**Scheme S1.** Schematic drawing of X-shaped DNA (X-DNA) structures and oligonucleotide

sequences<sup>#</sup> of the X-DNA building blocks for the trigonal-pyramid DNA nanostructure.<sup>##</sup>

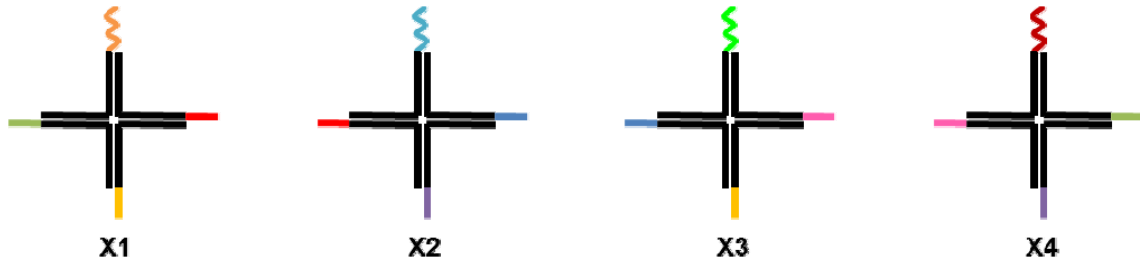

| Building block | Strand          | Segment 1             | Segment 2                                                                                                                                                                                                |
|----------------|-----------------|-----------------------|----------------------------------------------------------------------------------------------------------------------------------------------------------------------------------------------------------|
| X <sub>1</sub> | X <sub>11</sub> | 5'-(GT) <sub>20</sub> | CGA CCG ATG AAT AGC GGT CAG ATC CGT ACC TAC TCG<br>CGA GTA GGT ACG GAT CTG CGT ATT GCG AAC GAC TCG<br>CGA GTC GTT CGC AAT ACG GCT GTA CGT ATG GTC TCG<br>CGA GAC CAT ACG TAC AGC ACC GCT ATT CAT CGG TCG |
|                | X <sub>12</sub> | 5'-Phos-TGA CCC TT    |                                                                                                                                                                                                          |
|                | X <sub>13</sub> | 5'-Phos-ATC GGT AT    |                                                                                                                                                                                                          |
|                | X <sub>14</sub> | 5'-Phos-GCA TCT GG    |                                                                                                                                                                                                          |
| X <sub>2</sub> | X <sub>21</sub> | 5'-(T) <sub>4C</sub>  | CGA CCG ATG AAT AGC GGT CAG ATC CGT ACC TAC TCG<br>CGA GTA GGT ACG GAT CTG CGT ATT GCG AAC GAC TCG<br>CGA GTC GTT CGC AAT ACG GCT GTA CGT ATG GTC TCG<br>CGA GAC CAT ACG TAC AGC ACC GCT ATT CAT CGG TCG |
|                | X <sub>22</sub> | 5'-Phos-TTG CAC CT    |                                                                                                                                                                                                          |
|                | X <sub>23</sub> | 5'-Phos-GGA TCA TC    |                                                                                                                                                                                                          |
|                | X <sub>24</sub> | 5'-Phos-AAG GGT CA    |                                                                                                                                                                                                          |
| X <sub>3</sub> | X <sub>31</sub> | 5'-(AT) <sub>20</sub> | CGA CCG ATG AAT AGC GGT CAG ATC CGT ACC TAC TCG<br>CGA GTA GGT ACG GAT CTG CGT ATT GCG AAC GAC TCG<br>CGA GTC GTT CGC AAT ACG GCT GTA CGT ATG GTC TCG<br>CGA GAC CAT ACG TAC AGC ACC GCT ATT CAT CGG TCG |
|                | X <sub>32</sub> | 5'-Phos-CTG TTG GA    |                                                                                                                                                                                                          |
|                | X <sub>33</sub> | 5'-Phos-ATA CCG AT    |                                                                                                                                                                                                          |
|                | X <sub>34</sub> | 5'-Phos-AGG TGC AA    |                                                                                                                                                                                                          |
| X <sub>4</sub> | X <sub>41</sub> | 5'-(GA) <sub>20</sub> | CGA CCG ATG AAT AGC GGT CAG ATC CGT ACC TAC TCG<br>CGA GTA GGT ACG GAT CTG CGT ATT GCG AAC GAC TCG<br>CGA GTC GTT CGC AAT ACG GCT GTA CGT ATG GTC TCG<br>CGA GAC CAT ACG TAC AGC ACC GCT ATT CAT CGG TCG |
|                | X <sub>42</sub> | 5'-Phos-CCA GAT GC    |                                                                                                                                                                                                          |
|                | X <sub>43</sub> | 5'-Phos-GATGAT CC     |                                                                                                                                                                                                          |
|                | X <sub>44</sub> | 5'-Phos-TCC AAC AG    |                                                                                                                                                                                                          |

<sup>#</sup> Same color sequences represents the complementary sequences between each other.

<sup>##</sup> 5'-Phos represents the phosphorylated 5' end of the oligonucleotide

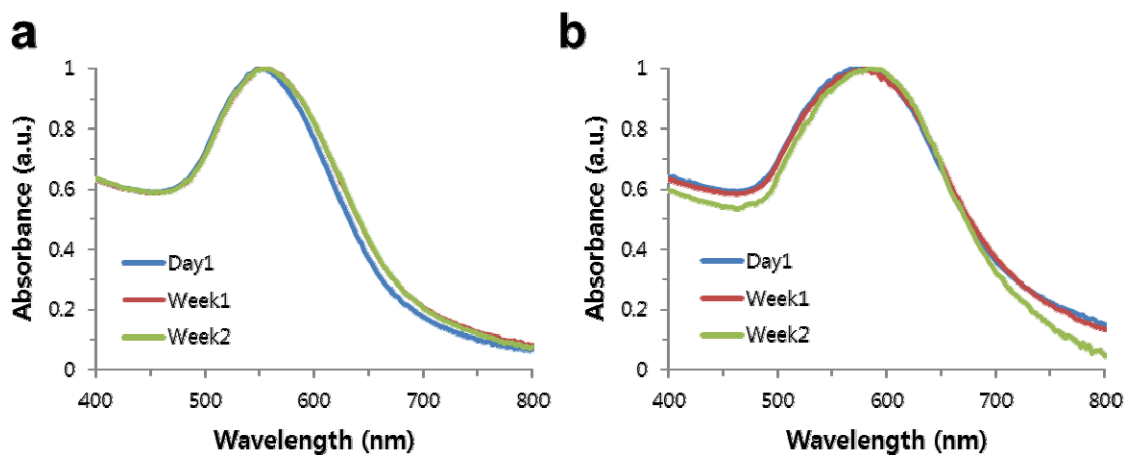

**Figure s1.** Colloidal stability of TANAs at a time of day 1, week 1 and week 2 after mixing the DNA structures and AuNPs. (a) Absorption spectrum of TANA obtained by mixing TP-DNA and AuNP in a ratio of 1:1, (b) Absorption spectrum of TANA obtained by mixing TP-DNA and AuNP in a ratio of 1:2.

**Scheme S2.** Schematic drawing of hexa-branched DNAs which have three partially complementary sticky ends (red letters) and other three non-complementary free ends (black letters) and oligonucleotide sequences of the hexa-DNA building blocks for the DNA cubic.

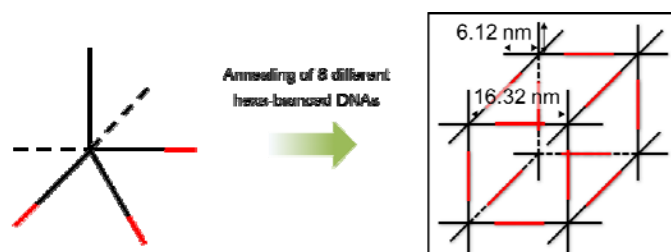

| Building block | Strand                                                                                                         | Segment 1                                                                                                                                       | Segment 2                                                                                                                                                                                                                                                                                                      |
|----------------|----------------------------------------------------------------------------------------------------------------|-------------------------------------------------------------------------------------------------------------------------------------------------|----------------------------------------------------------------------------------------------------------------------------------------------------------------------------------------------------------------------------------------------------------------------------------------------------------------|
| H <sub>1</sub> | H <sub>11</sub><br>H <sub>12</sub><br>H <sub>13</sub><br>H <sub>14</sub><br>H <sub>15</sub><br>H <sub>16</sub> | 5'-CTA ATC CGC ACA<br>5'-TAT CGA CCA TGC<br>5'-ATG GCA ACT ATA<br>5'-Phos-GCT AGA GTC GTT<br>5'-Phos-ACC TTA GAC TCT<br>5'-Phos-TTC GTA TGG ACA | TCG CTG ACG TTG CAG ACA TCA CGT TGA CGC TGT CGA<br>TCG ACA GCG TCA ACG TGA AAC GTG AAG CGT CTG CGA<br>TCG CAG ACG CTT CAC GTT GAG CAC AGA CGT TGA CGA<br>TCG TCA ACG TCT GTG CTC GCA GCG TCT TAA CGT CGA<br>TCG ACG TTA AGA CGC TGC AGA CGT TCA GGA CTA CGA<br>TCG TAG TCC TGA ACG TCT TGT CTG CAA CGT CAG CGA |
| H <sub>2</sub> | H <sub>21</sub><br>H <sub>22</sub><br>H <sub>23</sub><br>H <sub>24</sub><br>H <sub>25</sub><br>H <sub>26</sub> | 5'-TTC CTC ATG CGA<br>5'-AGC CTT GTA ACT<br>5'-Phos-AGA GTC TAA GGT<br>5'-Phos-GGT AAC ATT CCG<br>5'-CGG TTA CGA TTC<br>5'-Phos-ATT CGC TAC TCA | TCG CTG ACG TTG CAG ACA TCA CGT TGA CGC TGT CGA<br>TCG ACA GCG TCA ACG TGA AAC GTG AAG CGT CTG CGA<br>TCG CAG ACG CTT CAC GTT GAG CAC AGA CGT TGA CGA<br>TCG TCA ACG TCT GTG CTC GCA GCG TCT TAA CGT CGA<br>TCG ACG TTA AGA CGC TGC AGA CGT TCA GGA CTA CGA<br>TCG TAG TCC TGA ACG TCT TGT CTG CAA CGT CAG CGA |
| H <sub>3</sub> | H <sub>31</sub><br>H <sub>32</sub><br>H <sub>33</sub><br>H <sub>34</sub><br>H <sub>35</sub><br>H <sub>36</sub> | 5'-GGT AAC TAC TGT<br>5'-Phos-CGG AAT GTT ACC<br>5'-Phos-ATT GCC AGT TAG<br>5'-CTA TTC GGT CAA<br>5'-AAT TGC CTA GGT<br>5'-Phos-GTT AGC GAA ACT | TCG CTG ACG TTG CAG ACA TCA CGT TGA CGC TGT CGA<br>TCG ACA GCG TCA ACG TGA AAC GTG AAG CGT CTG CGA<br>TCG CAG ACG CTT CAC GTT GAG CAC AGA CGT TGA CGA<br>TCG TCA ACG TCT GTG CTC GCA GCG TCT TAA CGT CGA<br>TCG ACG TTA AGA CGC TGC AGA CGT TCA GGA CTA CGA<br>TCG TAG TCC TGA ACG TCT TGT CTG CAA CGT CAG CGA |
| H <sub>4</sub> | H <sub>41</sub><br>H <sub>42</sub><br>H <sub>43</sub><br>H <sub>44</sub><br>H <sub>45</sub><br>H <sub>46</sub> | 5'-CGG TTT CTA ACG<br>5'-Phos-AAC GAC TCT AGC<br>5'-ATT GGC TAC TCA<br>5'-CCT AAG TTT CGA<br>5'-Phos-CTA ACT GGC AAT<br>5'-Phos-TTG TCC TAA TCG | TCG CTG ACG TTG CAG ACA TCA CGT TGA CGC TGT CGA<br>TCG ACA GCG TCA ACG TGA AAC GTG AAG CGT CTG CGA<br>TCG CAG ACG CTT CAC GTT GAG CAC AGA CGT TGA CGA<br>TCG TCA ACG TCT GTG CTC GCA GCG TCT TAA CGT CGA<br>TCG ACG TTA AGA CGC TGC AGA CGT TCA GGA CTA CGA<br>TCG TAG TCC TGA ACG TCT TGT CTG CAA CGT CAG CGA |
| H <sub>5</sub> | H <sub>51</sub><br>H <sub>52</sub><br>H <sub>53</sub><br>H <sub>54</sub><br>H <sub>55</sub><br>H <sub>56</sub> | 5'-Phos-TGT CCA TAC GAA<br>5'-ATT GAC CAG ACG<br>5'-AAG TGG ATT ACC<br>5'-Phos-GGT AAT CTC AAG<br>5'-Phos-TCT TGC ATG GCA<br>5'-AGT AAC TGC GTT | TCG CTG ACG TTG CAG ACA TCA CGT TGA CGC TGT CGA<br>TCG ACA GCG TCA ACG TGA AAC GTG AAG CGT CTG CGA<br>TCG CAG ACG CTT CAC GTT GAG CAC AGA CGT TGA CGA<br>TCG TCA ACG TCT GTG CTC GCA GCG TCT TAA CGT CGA<br>TCG ACG TTA AGA CGC TGC AGA CGT TCA GGA CTA CGA<br>TCG TAG TCC TGA ACG TCT TGT CTG CAA CGT CAG CGA |
| H <sub>6</sub> | H <sub>61</sub><br>H <sub>62</sub><br>H <sub>63</sub><br>H <sub>64</sub><br>H <sub>65</sub><br>H <sub>66</sub> | 5'-Phos-TGA GTA GCG AAT<br>5'-CGT TGA ATC CTA<br>5'-Phos-TGC CAT GCA AGA<br>5'-Phos-ATT CGT AGA CTC<br>5'-GTT ACC ATA ACG<br>5'-TTT GCG ATC TAC | TCG CTG ACG TTG CAG ACA TCA CGT TGA CGC TGT CGA<br>TCG ACA GCG TCA ACG TGA AAC GTG AAG CGT CTG CGA<br>TCG CAG ACG CTT CAC GTT GAG CAC AGA CGT TGA CGA<br>TCG TCA ACG TCT GTG CTC GCA GCG TCT TAA CGT CGA<br>TCG ACG TTA AGA CGC TGC AGA CGT TCA GGA CTA CGA<br>TCG TAG TCC TGA ACG TCT TGT CTG CAA CGT CAG CGA |
| H <sub>7</sub> | H <sub>71</sub><br>H <sub>72</sub><br>H <sub>73</sub><br>H <sub>74</sub><br>H <sub>75</sub><br>H <sub>76</sub> | 5'-Phos-AGT TTC GCT AAC<br>5'-Phos-GAG TCT ACG AAT<br>5'-Phos-CCT ATG AAC GTT<br>5'-AAG GAT CCG TAT<br>5'-CTA AGG TTT CAC<br>5'-TTA GTT CCG ATC | TCG CTG ACG TTG CAG ACA TCA CGT TGA CGC TGT CGA<br>TCG ACA GCG TCA ACG TGA AAC GTG AAG CGT CTG CGA<br>TCG CAG ACG CTT CAC GTT GAG CAC AGA CGT TGA CGA<br>TCG TCA ACG TCT GTG CTC GCA GCG TCT TAA CGT CGA<br>TCG ACG TTA AGA CGC TGC AGA CGT TCA GGA CTA CGA<br>TCG TAG TCC TGA ACG TCT TGT CTG CAA CGT CAG CGA |
| H <sub>8</sub> | H <sub>81</sub><br>H <sub>82</sub><br>H <sub>83</sub><br>H <sub>84</sub><br>H <sub>85</sub><br>H <sub>86</sub> | 5'-Phos-CGA TTA GGA CAA<br>5'-Phos-CTT GAG ATT ACC<br>5'-AGC CAA ATG GTT<br>5'-GCT TTC CAT AGA<br>5'-Phos-AAC GTT CAT AGG<br>5'-TTG ACC TAA GGA | TCG CTG ACG TTG CAG ACA TCA CGT TGA CGC TGT CGA<br>TCG ACA GCG TCA ACG TGA AAC GTG AAG CGT CTG CGA<br>TCG CAG ACG CTT CAC GTT GAG CAC AGA CGT TGA CGA<br>TCG TCA ACG TCT GTG CTC GCA GCG TCT TAA CGT CGA<br>TCG ACG TTA AGA CGC TGC AGA CGT TCA GGA CTA CGA<br>TCG TAG TCC TGA ACG TCT TGT CTG CAA CGT CAG CGA |

## **Experimental details**

**General.** DNA materials were purchased from IDT and used without further purification. Water was triply distilled using a Millipore filtration system. Solutions of  $\text{HAuCl}_4$  and  $\text{NaBH}_4$  were freshly prepared in distilled water.

**Synthesis of DNA nanostructures.** Triangular DNA structure has been synthesized by hybridization of four X-shaped DNA followed by ligation. X-shaped DNAs have been fabricated by mixing equimolar amount of four partially complementary oligonucleotide sequences dispersed in pH 8.0, 1xTE buffer(see Table in Scheme S1) followed by annealing step. The detailed procedure followed previous report.<sup>1</sup> Four X-shaped DNAs fabricated in separate tubes were mixed in equimolar amount. The mixture was incubated in 35°C for 10 minutes and the temperature has been decreased to 16°C by 1°C in stepwise for every 5 minute. After completing the annealing, the buffer has been exchanged to DI water using Amicon centrifugal filter (3kD Mw cutoff). The hybridized DNA structures have been tightened by ligating X-DNAs. The ligation has been performed by adding 3 units of T4 DNA ligase to 1 nmole of total X-DNA amount at 16°C for 8 hrs. The synthesized triangular DNA nanostructures have been concentrated using Amicon centrifugal filter and resuspended in DI water to have an appropriate concentration.

**Preparation of the citric acid-capped gold nanoparticle.** An aqueous solution of 99.999% hydrogen tetrachloroaurate hydrate (12.5 ml, 10 mM) was added to 250 ml D.I. water on a stirring hot plate. To the rapidly-stirred boiling solution, 7.5 ml of 50 mM aqueous solution of sodium citrate tribasic dihydrate was quickly added. The color of the solution changed from yellow to purple and finally became red within 5 min. The mixture was removed from heat

when the solution had turned deep red and then cooled for 30 min at room temperature. After cooling, the reaction solution was dialyzed using Amicon ultra 100 kDa Mw cutoff centrifugal filters for purification.

**Ligand exchange to the positive-charged gold nanoparticle.** AuNP surface was dispersed in aqueous solution that contains lipoic acid derivative molecules with quaternary ammonium, which was reported previously, to enhance the colloidal stability and change the surface charge of AuNPs.<sup>2</sup> Lipoic acid-derived quaternary ammonium ion (1 ml, 10 mM) solution was mixed to 1 ml of 100 nM AuNP solution and stirred at room temperature. After 10 h, the reaction solution was dialysed three times using Amicon ultra 100 kDa Mw cutoff centrifugal filters for purification.

**Assembly of AuNPs on a DNA pyramid.** The complex has been made by simple mixing and incubation of positive-charged AuNPs and triangular DNA pyramid in a specific molar ratio at room temperature. The assembled complex of AuNPs and DNA nanostructures have been confirmed by measuring the plasmonic absorption peak shift using Agilent Technologies 8453 UV-Vis Spectrophotometer G1103A.

**AFM imaging.** All the Atomic Force Microscope (AFM) experiments were performed by tapping-mode XE-100 Park AFM system (Korea) with a liquid cell at room temperature. Silicon cantilevers (NSC36, Ti / Pt, 1 N/m) were utilized for imaging. The sample (5  $\mu$ l) was adsorbed on a freshly cleaved mica plate pretreated with 1x Tris-acetate-EDTA (TAE) buffer for 5 min at room temperature and then washed three times with a buffer solution containing 1x TAE and 10mM MgCl<sub>2</sub>.

## Reference

1. N. Park, J. S. Kahn, E. J. Rice, M. R. Hartman, H. Funabashi, J. Xu, S. H. Um and D. Luo, *Nature protocols*, 2009, **4**, 1759-1770.
2. H. Jin, J. Nam, J. Park, S. Jung, K. Im, J. Hur, J. Park, J. Kim and S. Kim, *Chemical Communications*, 2011, **47**, 1758-1760.
